# Supplementary material for: A Preliminary Evaluation of the Pro-Chondrogenic Potential of 3D-Bioprinted Poly(ester Urea) Scaffolds
Source: MDPI journal article supplement (doi:10.3390/polym12071478), 2020-06-30
Supplement: s1 [file s1]

Supporting Information

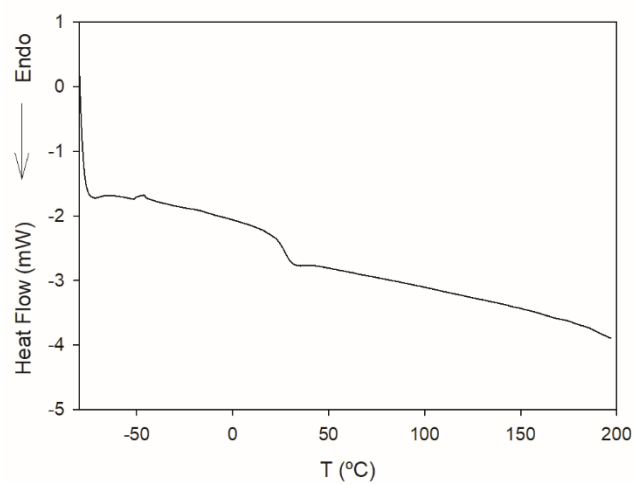

**Figure S1:** Heat flow curve (2<sup>nd</sup> heating cycle) of PEU.

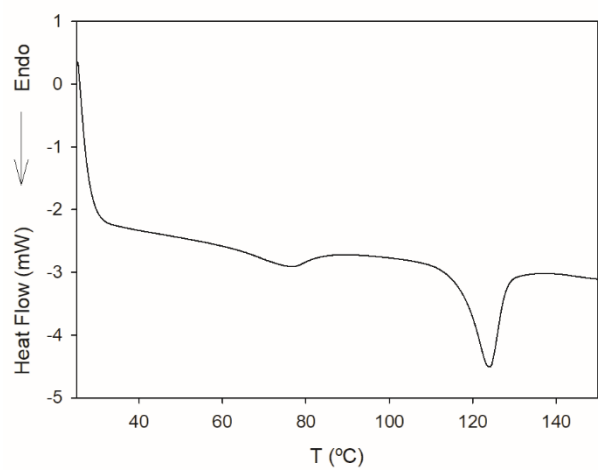

**Figure S2:** Heat flow curve (1<sup>st</sup> heating cycle) of PEU.
